# Supplementary material
Source: PubMed Central journal article supplement (PMC2729595)
Supplement: tpc.109.066654_1.pdf [file tpc.109.066654_1.pdf]

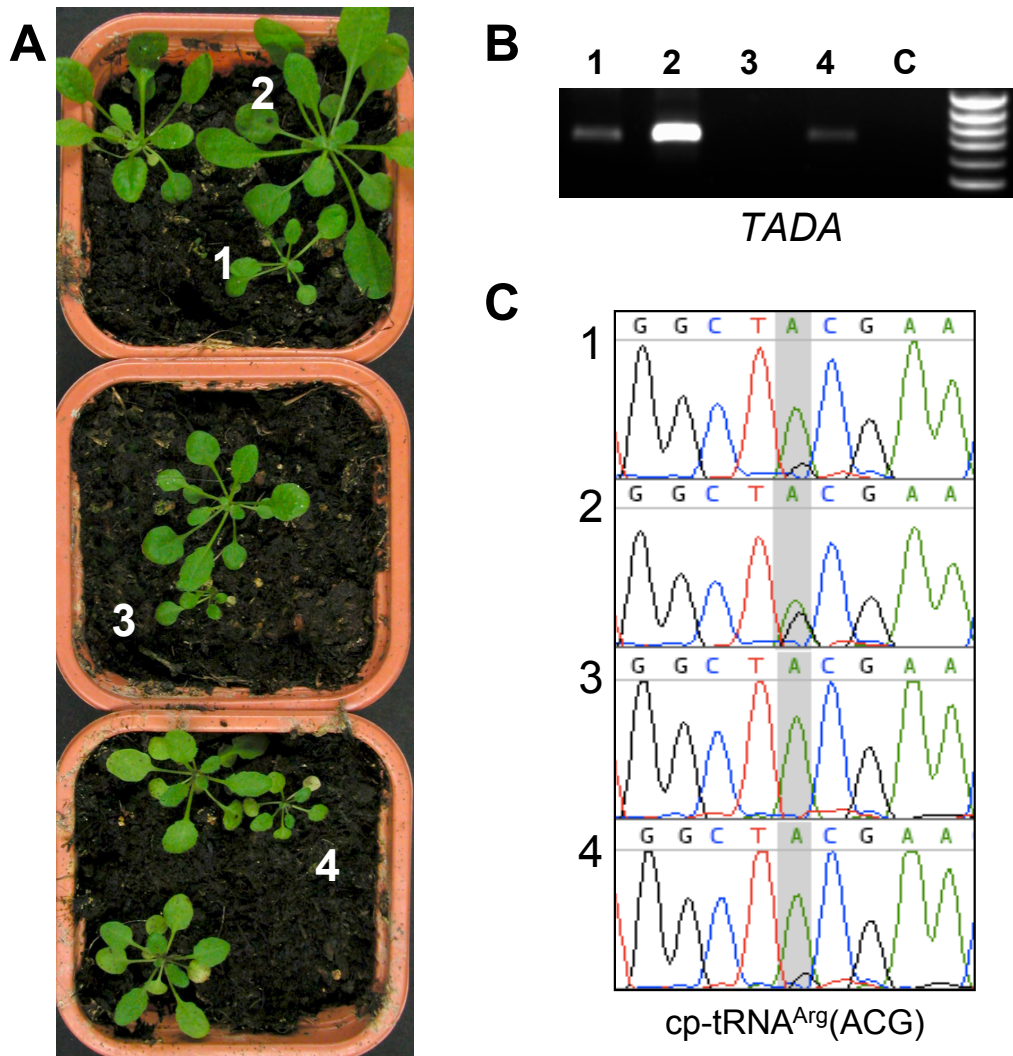

**Supplemental figure 4.** RNAi plants deficient in *TADA* expression are also affected in cp-tRNA<sup>Arg</sup> editing. (A) Phenotypes of slow growth of several individual plants of the RNAi line that expresses a *TADA*-specific RNA stem-loop. Plants that were further analyzed are numbered. (B) RT-PCR analysis of *TADA* gene mRNA accumulation in the selected plants. C is negative control. (C) Analysis of tRNA anticodon editing in selected plants shows that editing deficiency correlates with *TADA* silencing.

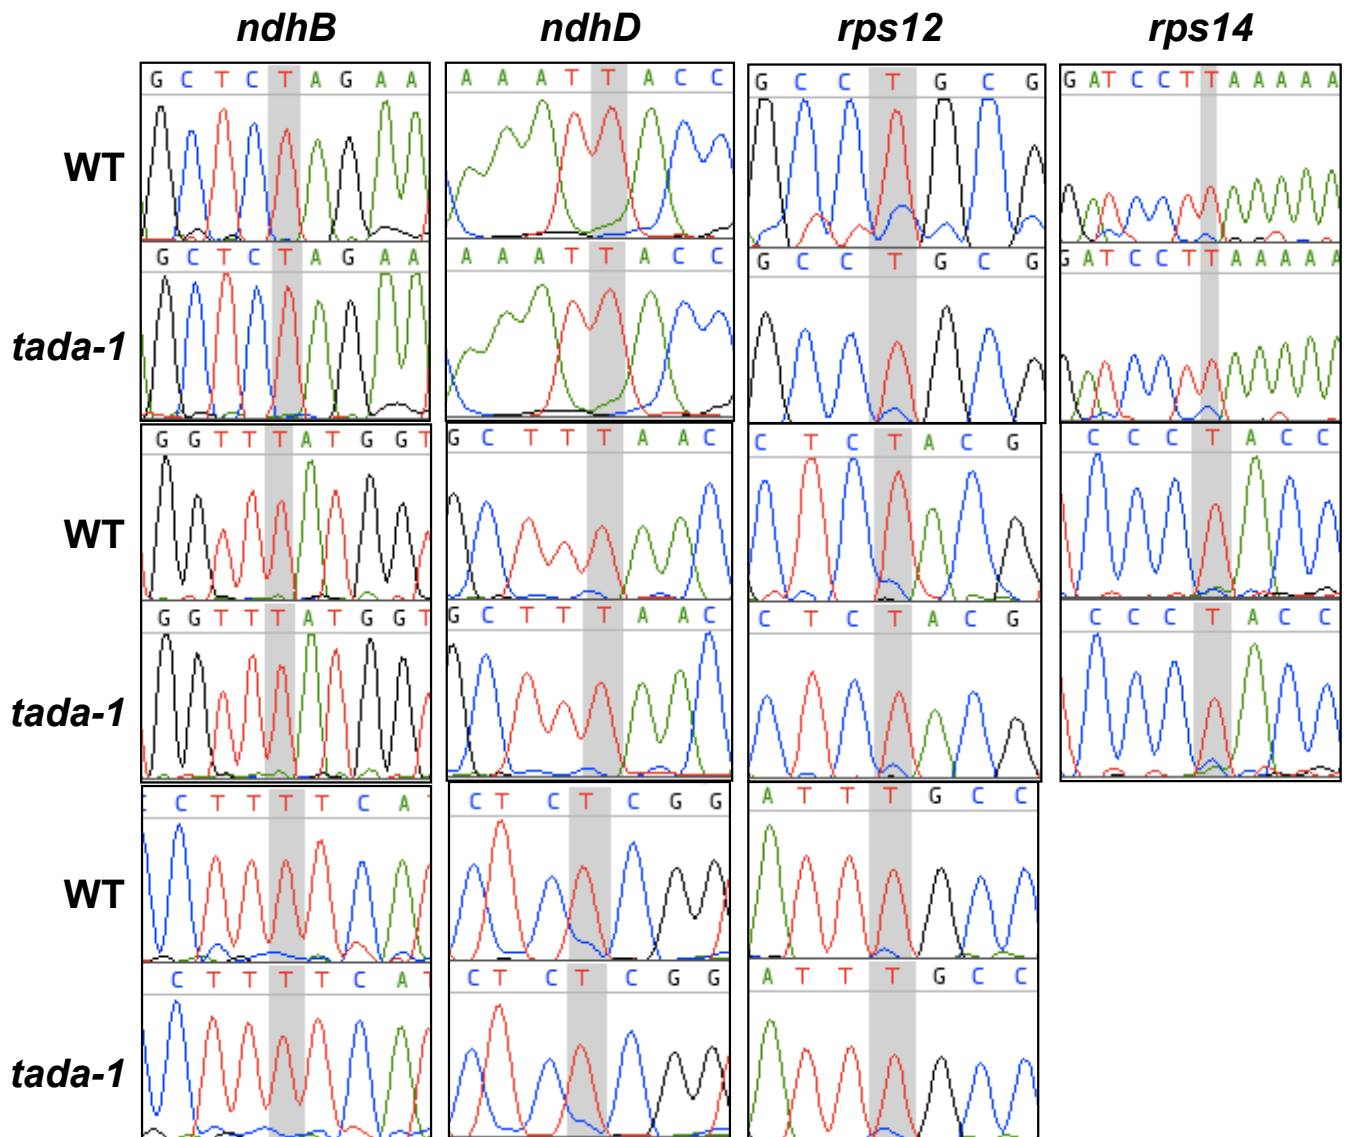

**Supplemental figure 5.** TADA is not involved in chloroplast C-to-U editing. Regions of several chloroplast gene transcripts comprising known editing sites were amplified by RT-PCR and sequenced. No difference could be found between *tada-1* and wild-type Col-0 plants.

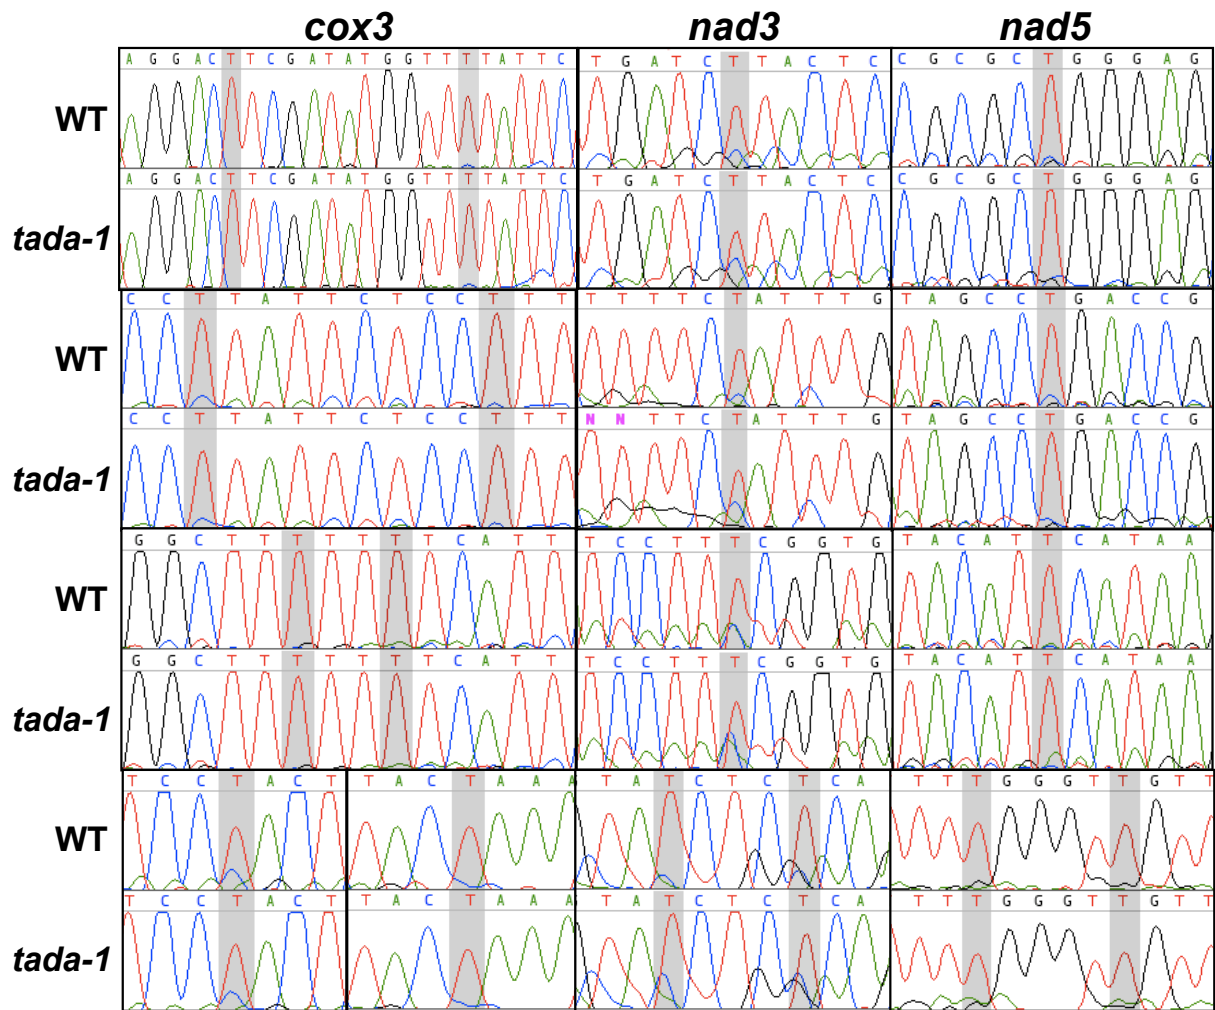

**Supplemental figure 6.** TADA is not involved in mitochondrial C-to-U editing. Regions of several mitochondrial gene transcripts comprising editing sites were amplified by RT-PCR and sequenced. All 82 sites analyzed on 6 different genes are edited in *tada-1*. Only a few examples are shown.



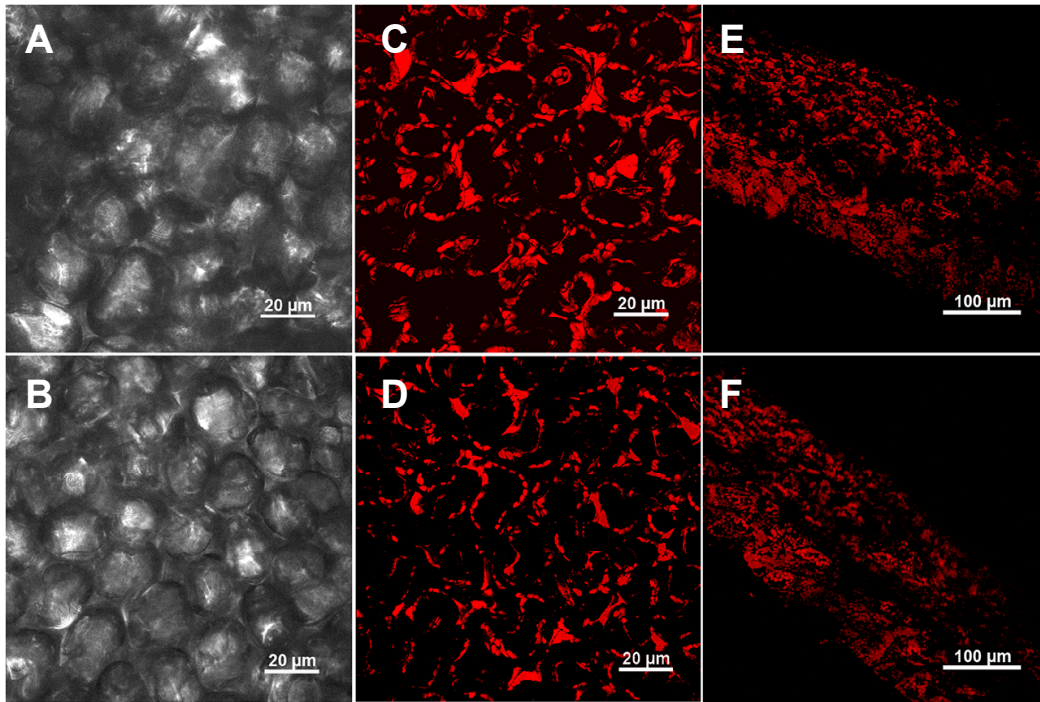

**Supplemental figure 7.** *tada-1* plants have normal leaf structure and equivalent number of chloroplasts per cell as wild type plants.

(A and B) Confocal microscope image of mesophyll cells of wild type (A) and *tada-1* (B) leaves (adaxial side) observed under visible light.

(C and D) Confocal images of the fluorescence of chlorophyll in leaves of wild type (C) and *tada-1* (D) plants suggest that there are no significant differences in the number of chloroplasts per cell in *tada-1*.

(E and F) The same as in C and D, in cross sections of wild type (E) and *tada-1* (F) leaves.

**Supplemental Table 1**Chlorophyll content of *tada-1* plants

|               | <i>μg/mg FW</i> |             |             | <i>mol/mol</i> |
|---------------|-----------------|-------------|-------------|----------------|
|               | chl a           | chl b       | chl a+b     | a/b            |
| WT            | 1.29 + 0.12     | 0.41 + 0.05 | 1.70 + 0.16 | 3.25 + 0.30    |
| <i>tada-1</i> | 0.54 + 0.09     | 0.17 + 0.04 | 0.71 + 0.12 | 3.27 + 0.27    |



## Supplemental Table 2

Similarities between the N-terminal and C-terminal domains  
of plant TADA proteins

Full length protein

IdentityScores(%)

|                | Arabidopsis | Phiscomytrella | Rice  | Soybean |
|----------------|-------------|----------------|-------|---------|
| Arabidopsis    | 100.0       | 10.7           | 18.4  | 33.1    |
| Phiscomytrella | 14.5        | 100.0          | 7.9   | 11.9    |
| Rice           | 32.5        | 11.7           | 100.0 | 18.2    |
| Soybean        | 47.5        | 16.1           | 30.3  | 100.0   |

Similarity Scores (%)

C-term domain

IdentityScores(%)

|                | Arabidopsis | Phiscomytrella | Rice  | Soybean |
|----------------|-------------|----------------|-------|---------|
| Arabidopsis    | 100.0       | 51.2           | 64.9  | 75.4    |
| Phiscomytrella | 61.0        | 100.0          | 48.1  | 50.2    |
| Rice           | 78.2        | 62.0           | 100.0 | 66.3    |
| Soybean        | 81.4        | 60.5           | 80.7  | 100.0   |

Similarity Scores (%)

N-term domain

IdentityScores(%)

|                | Arabidopsis | Phiscomytrella | Rice  | Soybean |
|----------------|-------------|----------------|-------|---------|
| Arabidopsis    | 100.0       | 2.7            | 13.7  | 24.1    |
| Phiscomytrella | 6.1         | 100.0          | 2.0   | 3.5     |
| Rice           | 28.8        | 4.7            | 100.0 | 12.5    |
| Soybean        | 39.8        | 6.8            | 25.9  | 100.0   |

Similarity Scores (%)

Supplemental Table 3

Accumulation of chloroplast transcripts in *tada-1* and *tada-1* complemented with  $\Delta$ N-TADA compared to Col-0

| AGI number | gene name     | <i>tada-1</i>             |               | $\Delta$ N-TADA           |               | AGI number            | gene name       | <i>tada-1</i>             |               | $\Delta$ N-TADA           |               |
|------------|---------------|---------------------------|---------------|---------------------------|---------------|-----------------------|-----------------|---------------------------|---------------|---------------------------|---------------|
|            |               | log <sub>2</sub> (mut/WT) | std deviation | log <sub>2</sub> (mut/WT) | std deviation |                       |                 | log <sub>2</sub> (mut/WT) | std deviation | log <sub>2</sub> (mut/WT) | std deviation |
| AtCg00020  | <i>psbA</i>   | 0,8054                    | 0,0491        | -0,1595                   | 0,0442        | AtCg00650             | <i>rpS18</i>    | 1,9344                    | 0,2780        | -0,2243                   | 0,0764        |
| AtCg00040  | <i>matK</i>   | 2,3189                    | 0,1101        | 0,5093                    | 0,0480        | AtCg00660             | <i>rpL20</i>    | 2,2311                    | 0,0343        | -0,1046                   | 0,0530        |
| AtCg00065  | <i>rpS12A</i> | 1,3696                    | 0,3918        | -0,0344                   | 0,0403        | AtCg00670             | <i>clpP1</i>    | 1,3675                    | 0,2835        | -0,4446                   | 0,0365        |
| AtCg00070  | <i>psbK</i>   | 0,9578                    | 0,1955        | 0,2535                    | 0,1647        | AtCg00680             | <i>psbB</i>     | 0,8433                    | 0,1387        | 0,1190                    | 0,0466        |
| AtCg00080  | <i>psbI</i>   | 1,2850                    | 0,0902        | 0,2482                    | 0,0267        | AtCg00690             | <i>psbT</i>     | 1,0385                    | 0,1910        | 0,3544                    | 0,0214        |
| AtCg00120  | <i>atpA</i>   | -0,1907                   | 0,2887        | -0,0109                   | 0,0442        | AtCg00700             | <i>psbN</i>     | 0,9276                    | 0,1431        | -0,3166                   | 0,0345        |
| AtCg00130  | <i>atpF</i>   | 0,0510                    | 0,3267        | 0,1497                    | 0,0347        | AtCg00710             | <i>psbH</i>     | 1,2012                    | 0,1858        | 0,1782                    | 0,0542        |
| AtCg00140  | <i>atpH</i>   | 1,0965                    | 0,1554        | 0,1458                    | 0,0485        | AtCg00720             | <i>petB</i>     | 1,3280                    | 0,1569        | -0,0650                   | 0,0573        |
| AtCg00150  | <i>atpI</i>   | 1,2991                    | 0,0879        | 0,3405                    | 0,0765        | AtCg00730             | <i>petD</i>     | 1,4878                    | 0,0986        | -0,1895                   | 0,0671        |
| AtCg00160  | <i>rpS2</i>   | 2,1155                    | 0,0213        | 0,1483                    | 0,0891        | AtCg00740             | <i>rpoA</i>     | 1,8270                    | 0,0805        | 0,2034                    | 0,0103        |
| AtCg00170  | <i>rpoC2</i>  | 1,7943                    | 0,0804        | -0,0408                   | 0,0462        | AtCg00750             | <i>rpS11</i>    | 1,6219                    | 0,1498        | 0,1208                    | 0,0447        |
| AtCg00180  | <i>rpoC1</i>  | 2,3223                    | 0,3357        | 0,0172                    | 0,0819        | AtCg00760             | <i>rpL36</i>    | 1,6840                    | 0,0868        | 0,1828                    | 0,0776        |
| AtCg00190  | <i>rpoB</i>   | 2,0063                    | 0,1816        | 0,0638                    | 0,0297        | AtCg00770             | <i>rpS8</i>     | 1,8282                    | 0,1574        | 0,1747                    | 0,0522        |
| AtCg00210  | <i>petN</i>   | 0,5397                    | 0,1392        | 0,2790                    | 0,0429        | AtCg00780             | <i>rpL14</i>    | 2,0004                    | 0,1015        | 0,1008                    | 0,0844        |
| AtCg00220  | <i>psbM</i>   | 1,2521                    | 0,1890        | 0,1488                    | 0,0643        | AtCg00790             | <i>rpL16</i>    | 2,2788                    | 0,2590        | 0,2985                    | 0,0170        |
| AtCg00270  | <i>psbD</i>   | 0,1718                    | 0,3309        | -0,3185                   | 0,0345        | AtCg00800             | <i>rpS3</i>     | 2,2956                    | 0,0504        | 0,1111                    | 0,0677        |
| AtCg00280  | <i>psbC</i>   | 0,3961                    | 0,2312        | -0,0289                   | 0,0080        | AtCg00810             | <i>rpL22</i>    | 2,4849                    | 0,1794        | 0,2469                    | 0,2123        |
| AtCg00300  | <i>psbZ</i>   | 0,5647                    | 0,1839        | -0,3080                   | 0,0267        | AtCg00820             | <i>rpS19</i>    | 2,1272                    | 0,1741        | 0,1292                    | 0,2021        |
| AtCg00330  | <i>rpS14</i>  | 1,2863                    | 0,1106        | -0,1024                   | 0,0121        | AtCg00830             | <i>rpL2</i>     | 1,9490                    | 0,3350        | 0,1127                    | 0,0429        |
| AtCg00340  | <i>psaB</i>   | 0,5365                    | 0,1639        | 0,0621                    | 0,0494        | AtCg00840             | <i>rpL23</i>    | 1,5826                    | 0,2384        | 0,2613                    | 0,0299        |
| AtCg00350  | <i>psaA</i>   | 0,4837                    | 0,2721        | 0,2099                    | 0,0715        | AtCg00860             | <i>ycf2.1</i>   | 2,2036                    | 0,2554        | 0,0595                    | 0,0528        |
| AtCg00360  | <i>ycf3</i>   | 2,3968                    | 0,2409        | 0,3084                    | 0,0205        | AtCg00870             | <i>ycf15</i>    | 2,1766                    | 0,2122        | -0,2576                   | 0,0420        |
| AtCg00380  | <i>rpS4</i>   | 0,9036                    | 0,1102        | -0,0262                   | 0,0381        | AtCg00890             | <i>ndhB</i>     | 2,1289                    | 0,3321        | 0,1418                    | 0,0845        |
| AtCg00420  | <i>ndhJ</i>   | 1,1838                    | 0,0364        | 0,0333                    | 0,0604        | AtCg00900             | <i>rpS7</i>     | 1,6901                    | 0,2161        | -0,0088                   | 0,0251        |
| AtCg00430  | <i>ndhK</i>   | 1,1638                    | 0,1312        | 0,0712                    | 0,0474        | AtCg01000             | <i>ycf1</i>     | 1,8017                    | 0,0899        | 1,0360                    | 0,0046        |
| AtCg00440  | <i>ndhC</i>   | 1,2007                    | 0,1800        | 0,0883                    | 0,0377        | AtCg01010             | <i>ndhF</i>     | 1,6878                    | 0,1986        | 0,4700                    | 0,0301        |
| AtCg00470  | <i>atpE</i>   | 1,3050                    | 0,3040        | 0,1823                    | 0,0312        | AtCg01020             | <i>rpL32</i>    | 1,4453                    | 0,1131        | 0,5855                    | 0,2508        |
| AtCg00480  | <i>atpB</i>   | 0,6658                    | 0,1833        | 0,2143                    | 0,0243        | AtCg01040             | <i>ccsA</i>     | 1,2967                    | 0,1533        | 0,4215                    | 0,0332        |
| AtCg00490  | <i>rbcL</i>   | -0,0113                   | 0,2145        | 0,4040                    | 0,0365        | AtCg01050             | <i>ndhD</i>     | 1,5050                    | 0,4549        | -0,0615                   | 0,0477        |
| AtCg00500  | <i>accD</i>   | 1,8685                    | 0,6108        | -0,3235                   | 0,0984        | AtCg01060             | <i>psaC</i>     | 1,0875                    | 0,3100        | 0,2204                    | 0,0920        |
| AtCg00510  | <i>psaI</i>   | 1,0765                    | 0,2086        | 0,0628                    | 0,0176        | AtCg01070             | <i>ndhE</i>     | 1,6530                    | 0,2138        | 0,0411                    | 0,0742        |
| AtCg00520  | <i>ycf4</i>   | 1,5718                    | 0,1285        | 0,1478                    | 0,0344        | AtCg01080             | <i>ndhG</i>     | 2,1465                    | 0,1331        | 0,0446                    | 0,1402        |
| AtCg00530  | <i>cemA</i>   | 1,7827                    | 0,3528        | -0,1010                   | 0,0484        | AtCg01090             | <i>ndhI</i>     | 1,6501                    | 0,0897        | 0,1128                    | 0,1466        |
| AtCg00540  | <i>petA</i>   | 1,8801                    | 0,0684        | -0,0745                   | 0,0203        | AtCg01100             | <i>ndhA</i>     | 1,2454                    | 0,2785        | 0,3119                    | 0,0342        |
| AtCg00550  | <i>psbJ</i>   | 2,2268                    | 0,2562        | 0,0380                    | 0,0620        | AtCg01110             | <i>ndhH</i>     | 1,4940                    | 0,2229        | 0,1077                    | 0,0572        |
| AtCg00560  | <i>psbL</i>   | 1,4054                    | 0,1798        | 0,2330                    | 0,0409        | AtCg01120             | <i>rpS15</i>    | 2,1629                    | 0,1058        | 0,1773                    | 0,1285        |
| AtCg00570  | <i>psbF</i>   | 1,4384                    | 0,1856        | 0,2257                    | 0,0386        | AtCg00920             | <i>rrn16S</i>   | 0,9788                    | 0,2123        | 0,2818                    | 0,2123        |
| AtCg00580  | <i>psbE</i>   | 1,3913                    | 0,1572        | 0,1761                    | 0,1059        | AtCg00950             | <i>rrn23S</i>   | 3,1049                    | 0,1752        | 0,0527                    | 0,1752        |
| AtCg00590  | <i>petL</i>   | 1,6698                    | 0,1699        | 0,1909                    | 0,0140        | 18S rRNA              | <i>nuc18S</i>   | 0,4364                    | 0,2150        | -0,1760                   | 0,2150        |
| AtCg00600  | <i>petG</i>   | 1,7946                    | 0,1898        | 0,2499                    | 0,0376        | At5g25760             | <i>UBC</i>      | -0,2292                   | 0,2230        | -0,0954                   | 0,0755        |
| AtCg00630  | <i>psaJ</i>   | 1,5379                    | 0,1534        | 0,6279                    | 0,0287        | At5g08290             | <i>YLS8</i>     | -0,1251                   | 0,1547        | -0,0264                   | 0,2767        |
| AtCg00640  | <i>rpL33</i>  | 1,5574                    | 0,1316        | 0,1686                    | 0,1864        | At3g18780 & At1g49240 | <i>actin2.8</i> | 0,0390                    | 0,1198        | 0,2592                    | 0,1092        |

**Supplemental Table 4**

Frequencies of CGN codons in *Arabidopsis* chloroplast-encoded protein genes

| Codon | cp-coded proteins<br>162 CDS's (41837 codons) |        |      | ribosomal proteins<br>29 CDS's (4008 codons) |        |      | rpo<br>4 CDS's (3461 codons) |        |      | Psa<br>5 CDS's (1651 codons) |        |      |
|-------|-----------------------------------------------|--------|------|----------------------------------------------|--------|------|------------------------------|--------|------|------------------------------|--------|------|
|       | #                                             | %Total | %CGN | #                                            | %Total | %CGN | #                            | %Total | %CGN | #                            | %Total | %CGN |
| CGG   | 192                                           | 0,5    | 14,3 | 28                                           | 0,7    | 11,0 | 27                           | 0,8    | 18,1 | 1                            | 0,1    | 2,7  |
| CGA   | 461                                           | 1,1    | 34,5 | 99                                           | 2,5    | 39,0 | 66                           | 1,9    | 44,3 | 12                           | 0,7    | 32,4 |
| CGU   | 516                                           | 1,2    | 38,6 | 103                                          | 2,6    | 40,6 | 32                           | 0,9    | 21,5 | 19                           | 1,2    | 51,4 |
| CGC   | 169                                           | 0,4    | 12,6 | 24                                           | 0,6    | 9,4  | 24                           | 0,7    | 16,1 | 5                            | 0,3    | 13,5 |
| Total | 1338                                          |        |      | 254                                          |        |      | 149                          |        |      | 37                           |        |      |

| Codon | Psb<br>15 CDS's (2407 codons) |        |      | Rbc1<br>1 CDS (480 codons) |        |      | PetA<br>1 CDS (321 codons) |        |      | PetB<br>1 CDS (216 codons) |        |      |
|-------|-------------------------------|--------|------|----------------------------|--------|------|----------------------------|--------|------|----------------------------|--------|------|
|       | #                             | %Total | %CGN | #                          | %Total | %CGN | #                          | %Total | %CGN | #                          | %Total | %CGN |
| CGG   | 5                             | 0,2    | 6,6  | 0                          | 0,0    | 0,0  | 0                          | 0,0    | 0,0  | 0                          | 0,0    | 0,0  |
| CGA   | 18                            | 0,7    | 23,7 | 6                          | 1,3    | 30,0 | 3                          | 0,9    | 33,3 | 2                          | 0,9    | 22,2 |
| CGU   | 43                            | 1,8    | 56,6 | 12                         | 2,5    | 60,0 | 4                          | 1,2    | 44,4 | 5                          | 2,3    | 55,6 |
| CGC   | 10                            | 0,4    | 13,2 | 2                          | 0,4    | 10,0 | 2                          | 0,6    | 22,2 | 2                          | 0,9    | 22,2 |
| Total | 76                            |        |      | 20                         |        |      | 9                          |        |      | 9                          |        |      |

### Supplemental Table 5

Primers used in this study

| Name      | Purpose                       | Sequence                                           |
|-----------|-------------------------------|----------------------------------------------------|
| P1        | Genotyping                    | CGAGTTTATCTGAAGAAGCCC                              |
| P2        | GFP construction              | CAAGGTACCTCTTCTAATTCAAC                            |
| P3        | Genotyping                    | TCCACCCACAAGTAACCTCC                               |
| P4        | GFP construction              | CTTGGATCCACTTCTCTTTCTTC                            |
| P5        | Genotyping                    | GGAGACTCGTTATAGCAGTGAG                             |
| P6        | Genotyping                    | GCCTCTTCAGATAGCTTTGACTG                            |
| P7        | TADA RT-PCR                   | AGGTGGAAACTTTGAGTTCC                               |
| P8        | $\Delta$ N-TADA pRSET cloning | GCGGATCCACTAGTCATGAGGGAAGCGTTAG                    |
| P9        | TADA RT-PCR                   | CTGCATGGGCAGTTGAATCACG                             |
| P10       | $\Delta$ N-TADA pRSET cloning | AGGAATTCTACAGACAGAAAAGG                            |
| P11       | cp-trnR editing test          | GGGCTTGTAGCTCAGAGG                                 |
| P12       | cp-trnR editing test          | TGGTGGGCGAGGAGGGATTCC                              |
| P13       | trnA editing test             | GGGGATGTAGCTCAGATGGTAG                             |
| P14       | trnA editing test             | TGGTGGAGATGCGGGGTATC                               |
| P15       | trnV editing test             | GGTTTCGTGGTGTAGTTGG                                |
| P16       | trnV editing test             | TGGTGGCTTCGCCCCGGTTC                               |
| P17       | trnT editing test             | GCTTTCATAGCTCAGTTGG                                |
| P18       | trnT editing test             | TGGTGCTTTCGTTGAGAGTTG                              |
| P19       | trnL editing test             | GTTGATATGGCCGAGTTGG                                |
| P20       | trnL editing test             | TGGTGTGACAGTGGGATTTC                               |
| P21       | trnI editing test             | GGCCATTAGCTCAGTTGG                                 |
| P22       | trnI editing test             | TGGTGGCCCATGCAGG                                   |
| P23       | trnR editing test             | GACTCCATGGCCCAATG                                  |
| P24       | trnR editing test             | TGGCTGGGGATCGAACC                                  |
| P25       | ndhB RT-PCR                   | CAACTCTGTATTCTCTATCC                               |
| P26       | ndhB RT-PCR                   | AGCTAGGATTTCCAGAAGAAGATGC                          |
| P27       | ndhD RT-PCR                   | GCGGCTTTTCCAGTTACTCGGGATTCC                        |
| P28       | ndhD RT-PCR                   | CAGGATCCGTTATAGAATAATACC                           |
| P29       | rps12 RT-PCR                  | TCTCACACCGGGTAAATCCT                               |
| P30       | rps12 RT-PCR                  | ATCCGAAACGTCACGAAATC                               |
| P31       | rps14 RT-PCR                  | ATAGGGAGAAGAAGAGGC                                 |
| P32       | rps14 RT-PCR                  | TGAACCATTTCCCGAAGG                                 |
| P33       | nad3 RT-PCR                   | AGCGAGAAAACAAAGTGGGC                               |
| P34       | nad3 RT-PCR                   | TGCCCTATCACTTTACTCCC                               |
| P35       | nad5 RT-PCR                   | GGTTACATCCATAAGTAGCTTGGTCC                         |
| P36       | nad5 RT-PCR                   | GCGATGACCCTCTTTAGATCG                              |
| P37       | cox3 RT-PCR                   | ATACCATGTTCTGTATGGTGG                              |
| P38       | cox3 RT-PCR                   | AAACCATGAAAGCCTGTTGC                               |
| P39       | ccb206 RT-PCR                 | CTCGTATATCGTGTAAACGC                               |
| P40       | ccb206 RT-PCR                 | TGGATTTTGCAGCTGTTCC                                |
| P41       | ccmC RT-PCR                   | TCAAAGACCAGAAGCTACGC                               |
| P42       | ccmC RT-PCR                   | CAAGATACGGGTTGAGAAGG                               |
| P43       | ccmFc RT-PCR                  | TTTATGGTCTGTGCTTGTGG                               |
| P44       | ccmFc RT-PCR                  | TTTCGTCTGTGCTCATTCCC                               |
| P45       | rps12 RT-PCR                  | GAAAAGAGAATAATGCCACG                               |
| P46       | rps12 RT-PCR                  | GAGGCATCTTCCATTCATATCG                             |
| P47       | $\Delta$ N-TADA construction  | GGGGACAAGTTTGTACAAAAAAGCAGGCTTACGGTCTCCTGCTGTAATGG |
| P48       | $\Delta$ N-TADA construction  | GGGGACCACTTTGTACAAAGAAAGCTGGGTCTTCCATTGTGTGGAGGA   |
| P49       | $\Delta$ N-TADA genotyping    | GTTCGAAGGTGAAGGTGACG                               |
| P50       | $\Delta$ N-TADA genotyping    | CTGCATGGGCAGTTGAATCACG                             |
| P51       | $\Delta$ N-TADA genotyping    | TCATGAGGGAAGCGTTAG                                 |
| P52       | $\Delta$ N-TADA genotyping    | GCGGGATATCACCACCTTTGTA                             |
| P53       | cp-trnR in vitro synthesis    | GAGGATCCGAATTGTAATACGACTCACTATAGGGCTTGTAGCTCAGAG   |
| P54       | cp-trnR in vitro synthesis    | GAGAATTCCTGGTGGGCGAGGAGGGATTCC                     |
| P55       | trnR in vitro synthesis       | GAGTAATACGACTCACTATAGGACTCCATGGCCCAATGG            |
| P56       | trnR in vitro synthesis       | CTGGATCCTGGCGACTCCACTGGGGATCGAACCAG                |
| P57       | trnA in vitro synthesis       | GAGTAATACGACTCACTATAGGGGATGTAGCTCAGATGG            |
| P58       | trnA in vitro synthesis       | CTGGATCCTGGTGGAGATGCGGGGTATCG                      |
| actin2.8F | qRT-PCR                       | GGTAACATTGTGCTCAGTGGTGG                            |
| actin2.8R | qRT-PCR                       | AACGACCTTAATCTTCATGCTGC                            |
| Q18SF     | qRT-PCR                       | AAACGGCTACCACATCCAAG                               |
| Q18SR     | qRT-PCR                       | ACTCGAAAAGAGCCCGGTATT                              |
| UBC-1     | qRT-PCR                       | TTCGTTCTTTGGGAAATTAGA                              |
| UBC-2     | qRT-PCR                       | CTCGCTGTACCTCTTTGATTCTTT                           |
| YLS8-1    | qRT-PCR                       | GGGATGAGACCTGTATGCAGATGGA                          |
| YLS8-2    | qRT-PCR                       | GCTCGTACATGGTGTGAAGTCTGG                           |
